1     **Title:** Adjustments of global and hindlimb local properties during the terrestrial locomotion  
2 of the common quail (*Coturnix coturnix*).

3

4     **Authors:** Emanuel Andrada<sup>1</sup>, John A. Nyakatura<sup>2</sup>, Florian Bergmann<sup>1</sup>, Reinhard Blickhan<sup>1</sup>

5

6     **Institutions:**

7     <sup>1</sup>Science of Motion, Friedrich-Schiller University Jena, Seidelstraße 20, 07749 Jena, Germany.

8     <sup>2</sup>Institut für Spezielle Zoologie und Evolutionsbiologie mit Phyletischem Museum, Friedrich-  
9 Schiller-Universität, D-07743 Jena, Germany.

10

11     Running title: Global and leg joint dynamics in the quail

12     **Corresponding author:**

13     Emanuel Andrada

14     [emanuel.andrada@uni-jena.de](mailto:emanuel.andrada@uni-jena.de)

15     **Keywords:** Avian locomotion, spring-mass, joint control, biomechanics, inverse dynamics, joint  
16 stiffness

17

18 **Abstract:**

19 Increasing insight into neuro-mechanical control strategies during perturbed locomotion is gained. In  
20 contrast, more general analyses on simple model (template) related parameters during avian terrestrial  
21 locomotion are still rare. Quails kinematic data obtained using X-ray videography combined with  
22 ground reaction force measurements were used as a basis to investigate how "global" template and  
23 "local" leg joint parameters in this small predominantly terrestrial bird change with speed and gait.  
24 Globally, quail locomotion approximates a spring-like behavior in all investigated gaits. However,  
25 ground reaction forces are more vertically oriented which may help to balance the trunk. At the joint  
26 level, practically all the spring like work was found to occur in the ITJ (intertarsal joint). From  
27 walking to grounded running the local stiffness of the ITJ decreases similarly to the reduction  
28 observed in global leg stiffness. Thus, in gaits without aerial phases the quails may modulate ITJ  
29 stiffness to regulate global leg stiffness, and therefore gait changes, to a significant degree. At higher  
30 speeds both global leg compression and stiffness are increased (the latter to values not significantly  
31 different to those obtained during walking). This enables the animals to shorten contact time and to  
32 generate aerial phases (running). However, we did not observe a change in the stiffness in the ITJ with  
33 a change of gait from grounded running to running. We hypothesize that a more extended leg at touch-  
34 down, controlled by the joint angles in knee and ITJ, has an important influence in the leg stiffness  
35 adjustment process during running.

36

37

38 **Introduction**

39 When birds increase speed during terrestrial locomotion, they change gait. First, birds change from  
40 walking to grounded running (a running gait without aerial phases (Rubenson et al., 2004)). At higher  
41 speeds most but not all birds studied so far change from grounded running to aerial running (e.g.,  
42 Cavagna et al., 1977; Gatesy and Biewener, 1991; Abourachid and Renous, 2000; Rubenson et al.,  
43 2004; Nudds et al., 2011; Stoessel and Fischer, 2012). Previous studies have shown that these  
44 transitions are often accompanied by i) smooth variations of spatio-temporal parameters as the speed  
45 increases (e.g., Gatesy and Biewener, 1991; Abourachid and Renous, 2000 ); ii) gradually increasing  
46 leg joint amplitudes with increase of speed (Gatesy and Biewener, 1991; Abourachid and Renous,  
47 2000; Nyakatura et al., 2012; Stoessel and Fischer, 2012), and iii) a gradual shift from vaulting  
48 mechanics towards bouncing mechanics of the center of mass (CoM) (Rubenson et al., 2004; Hancock  
49 et al., 2007; Nyakatura et al., 2012). Gait changes appear to not always be correlated to changes in the  
50 metabolic energy consumption, but specialized walking/running birds utilize specific gaits at given  
51 speeds on a treadmill in correlation to energetic minima (Rubenson et al., 2004; Nudds et al., 2011).  
52 Although these studies provided important insight into speed related changes of avian terrestrial  
53 locomotion, we still know surprisingly little about how global parameters and local parameters at the  
54 leg level vary with gait, and thus how their tuning influences gait and motor control strategies.

55

56 Global parameters describe biomechanical systems as a whole in the case of terrestrial locomotion by  
57 reducing the hindlimb to a "virtual leg" or "global leg" linking the hip or the CoM with the center of  
58 pressure (CoP), and by representing the complex action of muscles and tendons by a minimal number  
59 of parameters (see below). Such simple models of locomotion are often referred to as templates (Full  
60 and Koditschek, 1999). In contrast, assessing local parameters permits inference of each joint's  
61 contribution to global leg behavior. At the global level, the SLIP model (Spring Loaded Inverted  
62 Pendulum, also called spring-mass model; Blickhan, 1989) can accurately describe the dynamics of  
63 running and hopping, while the BSLIP model (Bipedal Spring Loaded Inverted Pendulum, also called  
64 bipedal spring-mass model) can predict those of moderate walking (Geyer et al., 2006; Lipfert et al.,  
65 2012) and grounded running (Andrada et al., 2012; Andrada et al., in press), if the appropriate limb  
66 parameters for these models are given (limb angle at touch-down, leg stiffness, effective limb length,  
67 and for the BSLIP also limb compression).

68

69 One of the most investigated global leg parameter is the leg stiffness. Interestingly, studies on speed  
70 related changes in leg stiffness during human and animal running leads to contradictory results. In  
71 some studies, leg stiffness has been reported to remain constant during running at different speeds both  
72 in animals and humans (He et al., 1991; Farley et al., 1993). In contrast, Arampatzis and colleagues  
73 (Arampatzis et al., 1999) reported that leg stiffness increase in human running when the speed  
74 increased. Experimental evidence shows also that when hopping or running humans encounter sudden

75 changes in substrate stiffness or damping (Farley et al., 1998; Ferris et al., 1999; Kerdok et al., 2002;  
76 Moritz et al., 2004) or changes in terrain height (Grimmer et al., 2008; Müller and Blickhan, 2010),  
77 subjects adapt their global leg parameters to the altered situation. For example, on surfaces with lower  
78 stiffness, humans increase leg stiffness. The change in leg stiffness is indicated by a reduction in the  
79 vertical downwards motion of the CoM from touch-down (TD) to mid-stance and nearly constant  
80 maximum leg force (Farley et al., 1998; Ferris et al., 1999; Kerdok et al., 2002). Runners on uneven  
81 ground decrease leg stiffness with the increasing height of the vertical perturbation (Grimmer et al.,  
82 2008). Here, in contrast to the results obtained on compliant surfaces, change in leg stiffness is more  
83 likely to be produced by an altered leg force (Grimmer et al., 2008). In addition, the adaptation of  
84 global leg parameters during running on uneven ground seems to exploit the self-stabilizing properties  
85 of the SLIP model to stabilize locomotion (Grimmer et al., 2008; Müller and Blickhan, 2010).  
86 Valuable experiments on running birds over tracks with unexpected changes of terrain height have  
87 also been conducted (e.g. Daley et al., 2006; Daley et al., 2007). Here, the delay in ground contact  
88 resulted in a steeper but more variable angle of attack. This effect could be attributed to swing-leg  
89 retraction, which can enhance the tolerance to ground disturbances significantly (Seyfarth et al., 2003).  
90 Although leg stiffness during the unexpected drop varied dramatically (Daley et al., 2007), it remains  
91 unclear how this adjustment of leg stiffness facilitated the continuation of rhythmic striding  
92 locomotion. More general information about gait related changes in avian leg stiffness is largely  
93 missing. In the present paper we aim to study how global leg stiffness in a small predominantly  
94 terrestrial bird changes with speed and gait, and which joints may mainly be responsible in tuning  
95 global leg stiffness.

96  
97 Our first main hypothesis is that at the global leg stiffness may approximate a spring-mass behavior  
98 for all gaits. Contrary to humans or large animals which walk with extended legs, and thus with high  
99 leg stiffness (for humans see Lipfert et al., 2012), the crouched posture observed in small animals (e.g.  
100 Biewener, 1989; Gatesy and Biewener, 1991; Witte et al., 2002; small animals being defined as having  
101 a body mass < 1 kg following Biewener, 1989) may enable spring-like locomotion at lower speeds. In  
102 particular, we expect that overall low stiffness is highest during walking. Joint angles undergo smaller  
103 flexions during walking as compared to running (e.g. Gatesy and Biewener, 1991; Abourachid et al.,  
104 2011; Nyakatura et al., 2012; Stoessel and Fischer, 2012). When switching from walking to grounded-  
105 running this is considered to be equivalent to a switch from stiff legged vaulting to compliant  
106 bouncing. We also expect a transition between grounded running and running to be represented by an  
107 increase of both global leg stiffness and global leg compression, to cope with the reduced contact  
108 times and to exert higher vertical GRF.

109  
110 Our second main hypothesis is that the more distal joints (intertarsal joint [ITJ], and the  
111 tarsometatarso-phalangeal joint [TMTJ]) are responsible for tuning global leg stiffness, and therefore

112 play an important role in controlling gait transitions. We base this expectations on the result of  
113 previous studies, that have shown in running guinea fowl the more distal joints may act as spring-like  
114 elements, while more proximal ones (hip, knee) did not show energy storage during either level  
115 running (Daley and Biewener, 2003) or unexpected drops (Daley et al., 2007). Similarly, Rubenson  
116 and colleagues showed that ostrich store and release elastic energy mainly in the TMTJ (Rubenson et al.,  
117 2010). In humans, Kuitunen and colleagues (Kuitunen et al., 2002) observed increments in the knee  
118 stiffness with increasing running speed. Others (Farley and Morgenroth, 1999; Müller et al., 2010)  
119 reported that leg stiffness during hopping and running over uneven terrain seems to depend mostly on  
120 ankle stiffness. In order to test our second hypothesis we expect correlation between the changes  
121 observed in the global stiffness with those observed at the joint level.

122

123 We investigate this by combining kinematic data derived from X-ray motion analysis with single limb  
124 force plate measurements during the locomotion of the common quail. This permits us to evaluate both  
125 the virtual leg function during stance (CoP-CoM), and joint mechanics by using inverse dynamics  
126 analysis and joint kinematics.

127

## 128 **Material and methods**

129

### 130 *2.3.1 Animals*

131 Eight adult common quails (Phasianidae: *Coturnix coturnix*, Bonnaterre 1791) weighing between 180  
132 g and 240 g were obtained from local breeders. The birds were housed in spacious cages with access to  
133 food and water *ad libitum*. The Committee for Animal Research of the State of Thuringia, Germany,  
134 approved the animal care and all experimental procedures (registry number: 02-47/10).

135

### 136 *2.3.2 X-ray motion analysis*

137 The birds moved across a 3 m long walking-track at their preferred speeds. The track was covered  
138 with fine sand paper (grit 40) to reduce slipping. We simultaneously recorded kinematics and ground  
139 reaction forces (GRFs). For the kinematic analysis, synchronized, biplanar X-ray videography  
140 (Neurostar, Siemens<sup>®</sup>, Erlangen, Germany) at the facility of the Institut für Spezielle Zoologie und  
141 Evolutionsbiologie mit Phyletischem Museum, Germany was used. X-ray recordings were taken from  
142 the latero-lateral and ventro-dorsal projections. Due to the limited size of the image intensifiers only  
143 38 cm of the track (including the instrumented part - see below) were visible in the X-ray recordings.  
144 Our experimental setup additionally had two synchronized standard light high-speed cameras  
145 (SpeedCam Visario g2, Weinberger<sup>®</sup>, Erlangen, Germany) filming from a frontal and lateral  
146 perspective to cover a larger portion of the track. The X-ray machine operated at 40 kV and 53 mA,

147 with a sampling frequency of 1 kHz. We filtered the raw video data (e.g., gamma correction, contrast,  
148 sharpness) and, finally, performed the digitization of the joints and other landmarks (Fig. 1A) using  
149 SimiMotion<sup>®</sup> software (SimiMotion Systems, Unterschleißheim, Germany). X-ray videos suffer from  
150 distortion and were therefore corrected prior to analysis with use of a freely available MATLAB<sup>®</sup> (the  
151 Mathworks Inc., Natick, MA, USA) routine ([www.xromm.org](http://www.xromm.org)) provided by Brown University  
152 (Providence, USA).

153

### 154 *2.3.3 Force data acquisition and analysis*

155 We measured three-dimensional GRFs (ground reaction forces) and CoP (center of pressure) with two  
156 custom-built (8 cm x 9 cm) force plates, which we integrated into the walking-track. In order to  
157 reduce metal parts in the area of the X-ray beams, we used carbon fiber to construct the force plates  
158 and their support. We used 6-DOF (degree of freedom) force-torque sensors (ATI nano17<sup>®</sup>) as  
159 transducer elements. Using fast Fourier transformation, we measured the plates' dominant  
160 eigenfrequency, which turned out to be above 200 Hz. Furthermore, our static tests revealed the  
161 resolution of the CoP position to be below 1 mm at loads higher than 300 mN. According to the  
162 sampling rate of the kinematic data, we collected ground reaction forces at 1 kHz (NI USB-6229,  
163 National Instruments<sup>®</sup>; custom software LabView 2009 National Instruments<sup>®</sup>). We synchronized  
164 force and X-ray analysis electronically (post-trigger).

165

### 166 *Determination of limb element and body part properties*

167 One of the individuals (subject 6) was sacrificed and dissected. Limb elements were detached  
168 at the joints and body elements (torso, head, and neck) were dissected from each other. We then  
169 weighed each element and used a pendulum method to determine each element's CoM position as  
170 described in (Nyakatura et al., 2012) (Table 2). Elements were defined using landmarks which are  
171 easy to identify in the x-ray films (Fig. 1A), and the position of the element's CoM is presented as %  
172 of element length measured from the proximal landmark (Table 1). The following elements and body  
173 parts were defined (from proximal to distal or cranial to caudal landmarks, respectively): thigh (femur  
174 proximal to femur distal), tibiotarsus (tibiotarsus proximal to tibiotarsus distal), tarsometatarsus  
175 (tarsometarsus proximal to tarsometatarso-phalangeal joint), toes (tarsometatarso-phalangeal joint to  
176 tip of middle toe), trunk including the wings (from caudalmost cervical vertebra to pygostyl), neck  
177 (occiput to caudalmost cervical vertebra), head (tip of beak to occiput). For toes and tarsometatarsus  
178 the position of the CoM was assumed to be at half the length of these cylindrical elements. We also  
179 assumed a fixed CoM position between the two landmarks defining the neck, to account for the  
180 constant changes of its length due to movements of the head relative to the trunk. We used linear

181 transformation of the data of the sacrificed subject to estimate the element parameters of the other  
182 subjects in accordance to a subject's overall weight.

183

#### 184 *Mechanics of the center of mass*

185 To distinguish between walking and grounded running, it is necessary to assess the fluctuations of  
186 gravitational potential energy ( $E_p$ ) and kinetic energy ( $E_k$ ) of the body's CoM due to the gradual shift  
187 of kinematic parameters between both gaits (Gatesy and Biewener, 1991; Stoessel and Fischer, 2012).  
188 Moreover, it has been demonstrated that terrestrial locomotion in small birds rarely approaches the  
189 ideal cases of either in-phase or out-of-phase fluctuation of both energy forms ( e.g. Hancock et al.,  
190 2007; Nyakatura et al., 2012) as proposed to define walking and running mechanics (e.g. Cavagna et  
191 al. 1977; Heglund et al., 1982; Blickhan and Full, 1992). For the purposes of this study we categorized  
192 all trials to either walking, grounded running, or running. We relied on the percentage of congruity, as  
193 proposed by (Ahn et al., 2004), between  $E_p$  and  $E_k$  to discriminate running from walking. This  
194 parameter more closely compares the form of the graphs for  $E_p$  and  $E_k$  and therefore was suggested to  
195 better reflect the phase relationship than a mere comparison of the local minima as in the calculation of  
196 phase shift. %Congruity is calculated using the product of instantaneous changes (here video frames)  
197 between  $E_p$  and  $E_k$ . All cases of a product greater than zero, that is, when the two energies are  
198 congruent, are summed and reported as the percentage of overall frames. Ideally, %Congruity would  
199 be 100% in a running trial and 0% in a walking trial. We defined walking for %Congruity values < 50  
200 and running for %Congruity values > 50. For values close to 50% we further analyzed the shape and  
201 value of the GRF, and vertical speed change of CoM at mid-stance (anterior-posterior GRF,  $F_x = 0$ ). In  
202 running, i.e. bouncing mechanics, the CoM's vertical speed changes from negative to positive at mid-  
203 stance. For symmetric steady-state walking, vertical GRF has to be lower than body weight (1 BW) at  
204 mid-stance (M-shape), and CoM's vertical speed changes from positive to negative at mid-stance, i.e.  
205 vaulting mechanics. We are aware of the fact that asymmetries as usually observed in animal  
206 locomotion will slightly shift the local extremes of the force patterns and thus the transition speed.

207

208 We calculated the instantaneous position of the body's CoM from kinematic data (X-ray motion  
209 analysis data of the limbs, additional kinematic data of digitized head, neck and torso landmarks, and  
210 each element's CoM position). To validate the kinematic analysis, we also determined the CoM  
211 trajectory by double integration of the anterior-posterior and vertical accelerations ( $a_x$ ;  $a_y$ ) obtained  
212 from the measured GRF divided by body mass. As initial position of the CoM ( $s_{0x}$ ;  $s_{0y}$ ) we used those  
213 obtained kinematically. As kinematic methods do not account for movement of appendages and  
214 viscera, kinematically determined CoM initial speeds ( $v_{0x}$ ;  $v_{0y}$ ) are imprecise to be used as integration  
215 constants. Thus, we optimized CoM initial speeds' estimates by minimizing the sum of squared  
216 distances between the kinematically determined CoM trajectory and CoM trajectory derived from

217 force plate analysis as described in (Daley et al., 2007). For locomotion close to steady-state, both  
218 methods match (Fig. 2A).

219

#### 220 2.3.4 Global and local leg stiffness

221 The global analysis is based on the BSLIP template (Geyer et al, 2006). The BSLIP model consists of  
222 the body as a point mass  $m$  at the CoM and two massless, linear springs with a given stiffness  $k$  and  
223 rest length  $l_0$  describing the action of the legs during stance. Each spring acts independently, and the  
224 swing phase is used to adjust the angle of attack  $\alpha_0$  related to the ground or the aperture angle  $\phi_0$   
225 related to the stance leg (Fig. 1D). Motion is restricted to the sagittal plane, hence the equations of  
226 motion of the CoM are:

$$227 \quad m\ddot{x} = -k(l_0 - l_1)\cos\alpha_1 - k(l_0 - l_2)\cos\alpha_2 \quad (1)$$

$$228 \quad m\ddot{y} = -mg + k(l_0 - l_1)\sin\alpha_1 + k(l_0 - l_2)\sin\alpha_2 \quad (2),$$

229 where  $\ddot{x}, \ddot{y}$  are the accelerations of the CoM,  $m$  is the body mass,  $g$  is the gravitational acceleration,  $l_1$   
230 and  $l_2$  are the instantaneous leg lengths during stance, and  $\alpha_1$  and  $\alpha_2$  are the corresponding orientations  
231 between the ground and each leg. In the single-support phase, only one leg exerts force and the last  
232 right-hand term in both equations is zero, whereas in the double-support phase both legs exert force  
233 and hence, all right-hand terms in both equations are nonzero. During aerial phases, the trajectory of  
234 the center of mass is influenced only by the gravitational force.

235 To estimate the global leg stiffness  $k$  from experimental data, we computed first the instantaneous  
236 virtual leg length as the distance between CoM and CoP. As virtual leg length is normally non-  
237 symmetrical relative to touch-down (TD) and take-off (TO) events, we averaged relative virtual leg  
238 lengths in order to determine the global leg stiffness  $k$  from kinetic data. We computed  $k$  as  
239  $k = GRF_{mid-stance} / \Delta l$ , where  $\Delta l = (l_{leg\_TD} + l_{leg\_TO}) / 2 - l_{leg\_mid-stance}$ . Note that  
240  $l_0 = (l_{leg\_TD} + l_{leg\_TO}) / 2$  is the rest length of the assumed spring (Fig. 3). This approach assumes that  
241 the virtual leg behaves like a linear spring. To enable comparison with other species we present global  
242 and local parameters in dimensionless form, following Andrada and co-workers (Andrada et al., 2012;  
243 Andrada et al., in press). Dimensionless global leg stiffness was defined as  $\hat{k} = kl_0/mg$ , where  $m$  is the  
244 mass of the bird and  $g$  gravity. The dimensionless global leg compression ( $\psi$ ) related to the  
245 compression of the spring at mid-stance is equal to the GRF in body weight (  
246  $\psi = GRF / mg = k(l_0 - l) / mg$ ; see Andrada et al., 2012; Andrada et al., in press).

247

248 We determined the angle of attack at touch-down ( $\alpha_0$ ) between the ground and the segment CoM-CoP  
249 as shown in Fig. 1C, and the aperture angle  $\phi_0$  at touch-down, following Andrada and colleagues  
250 (Andrada et al., in press), by computing the angle between the CoPs of the stance legs and the CoM



251 (Fig. 1C). We measured limb segmental angles related to the ground, and joint angles as shown in Fig.  
252 1B.

253 Global leg properties must be generated locally at the joint level. Calculation of local stiffness requires  
254 estimates of joint torques. We estimated torque at each joint during stance using a quasi-static analysis  
255 neglecting segment inertia and weight. Especially during slow locomotion, the error in estimating joint  
256 torques from GRF should be negligible (as linear and rotational accelerations are low). Moreover,  
257 Witte and co-workers showed that for small mammals even during fast locomotion the inertia of the  
258 extremities only contribute a maximum of 10% to overall forces (Witte et al., 2002). In our case, even  
259 at the maximal running speed measured, the influence of femur segment's moment of inertia to the

260 joint torque, estimated as a thin rod  $J_f \ddot{\theta}_f = \frac{m_f l_f^2}{3} \ddot{\theta}_f$ , is lower than 5% of the maximal observed  
261 torque (cp. Fig. 7). Here,  $J_f$  represents the moment of inertia,  $l_f$  the length, and  $m_f$  the mass of the  
262 femur (see Table 1).  $\ddot{\theta}$  represents the maximal angular acceleration of the segment measured during  
263 running (800 1/s<sup>2</sup>). Thus, external torque was computed as the magnitude of the cross product between  
264 the instantaneous joint position vector relative to the position of the CoP, and the instantaneous GRF  
265 vector P (KNEE and ITJ instantaneous joint positions were assumed to be located in the middle  
266 between the distal and proximal ends of adjacent bones; while HIP and TMTJ joints were assumed to  
267 be located at the proximal tip of the femur and the distal tip of the tarso-metatarsus, respectively).

### 269 *Data analysis*

270 For final data analysis we were able to obtain a total of 74 steady-state strides (32 walking, 34  
271 grounded running, and 8 running) of biplanar X-ray recording and synchronous, single limb SRF  
272 traces. For our investigation of steady-state locomotion we discarded all trials with a horizontal speed  
273 deviation of more than 5 % during stance. Trials fulfilling this criterion were the exception. About 10  
274 trials were necessary to obtain a single steady-state trial with both feet not overstepping one of the  
275 plates. In most cases these successful trials were grounded runs or walking trials, while aerial running  
276 was rarely used by the quails (note that in previously published treadmill studies quails never ran using  
277 aerial phases; cf.(Gatesy and Biewener, 1991; Stoessel and Fischer, 2012)). We used t-test to determine  
278 whether maximal joint torques, linear and rotational stiffness are gait related (significance level  $p <$   
279 0.05) in SPSS 18 (IBM, Armonk, NY, USA).

### 281 *Simulations*

282  
283 Subsequently, we performed BSLIP forward simulations using the mean values of the global  
284 parameters obtained experimentally to test for differences between observed data and the linearity  
285 assumptions of the BSLIP. We compared GRFs, leg length variation, and contact time from both  
286 experimental and BSLIP results during walking, grounded running and aerial running. For walking

287 and grounded running simulations started at mid-stance ( $x_0 = 0$  and  $v_{0y} = 0$ ). Running simulation  
 288 started at the *apex* ( $y_{\max}$ ,  $x_0 = 0$ ,  $v_{0y} = 0$ ).  $v_{0x}$ ,  $k$ ,  $l_0$ , and,  $\phi_0$  or  $\alpha_0$  were set according to the experimental  
 289 data, while the initial high  $y_0$  was set to match best possible the value of the  $\text{GRF}/mg = \psi$  at mid-  
 290 stance. For walking and running, we applied the commonly used angle of attack as TD strategy. For  
 291 grounded running the aperture angle between legs was preferred (following Andrada et al., 2012;  
 292 Andrada et al., in press).

293 Applying the fixed aperture angle  $\phi_0$  between legs, the touch-down of the swing leg occurs  
 294 when  $y = l_0 \sin(\alpha - \phi_0)$ , where  $\alpha$  is the instantaneous stance leg angle with respect to the ground  
 295 measured clockwise (Fig. 1D). In contrast, using the fixed angle of attack  $\alpha_0$ , touch-down of the swing  
 296 leg occurs when  $y = l_0 \sin \alpha_0$ . Take-off occurs when the spring force becomes zero. During running  
 297 we ensure that only one leg can land at a time. We implemented the simulation model in  
 298 MATLAB/SIMULINK<sup>®</sup> (The MathWorksInc., Natick, MA, USA). To integrate eq. 1) and 2) we  
 299 applied a Runge–Kutta variable-step algorithm (ode45) with a relative and absolute integrator error  
 300 tolerance of 1e-9.

301

302

## 303 Results

304

305 Walking was observed at speeds ranging from 0.15 m/s to 0.51 m/s with a mean of 0.34 m/s, grounded  
 306 running at speeds between 0.42 m/s and 0.79 m/s with a mean of 0.58 m/s, and aerial-phase running  
 307 gaits were observed at speeds ranging from 0.75 m/s to 1.56 m/s with a mean of 1.06 m/s. The  
 308 walking-grounded running transition showed a speed overlap of 0.09 m/s. Grounded running-running  
 309 transition seems to be more defined (just one running trial overlapped with grounded running speeds,  
 310 Fig. 2B).

311 The vertical component of the GRF we obtained for the quails displayed the well-known M-shape for  
 312 walking, a positive skewed half-sine pattern for grounded running, and a less skewed half-sine shape  
 313 for running (Fig. 4). Notably, at very slow walking the vertical component of the GRF displayed a  
 314 three peaks shape, as predicted by the BSLIP model (Geyer et al., 2006) but uncommon in human  
 315 bipedalism (Fig. 5). Anterior-posterior GRFs approximated negative sine-waves for the different gaits.

316

### 317 *Gait related changes in global parameters*

318 The asymmetry of the virtual leg length between TD and TO events increased with the speed (Fig. 4).  
 319 While the angle of attack was not significantly different between gaits, the aperture angle varied  
 320 significantly between walking and grounded running (Table 2). The value  $l_0$ , associated with the rest  
 321 length of the spring in the (B)SLIP model, was similar for walking and grounded running, but  
 322 significantly longer for running (Table 2). Leg stiffness decreased significantly from walking to  
 323 grounded running and increased again significantly at running gaits. Interestingly, leg stiffness during

324 walking and running did not differ significantly, while global leg compression increased with speed  
325 and was significantly different between gaits (Table 2). Our findings show two important deviations  
326 between experimental data and (B)SLIP model assumptions. The first is that GRF are not directed to  
327 the CoM as expected for the (B)SLIP model, but more vertically oriented. The second difference from  
328 the SLIP is shown by the fact that CoP is shifted cranially during stance. It starts approximately  
329 halfway between the tarsometatarso-phalangeal joint (TMTPJ) and tip of the middle toe (ToMT) and  
330 moves cranially up to the ToMT during stance (Fig. 6). Nevertheless, simulation results match  
331 surprisingly well the quails' leg length variation displayed during walking, grounded running, and  
332 aerial running. GRF profiles display more marked differences. These are, for grounded and aerial  
333 running, mostly related to the symmetry of the BSLIP model. In case of walking the M-shape of the  
334 simulated vertical GRF almost disappears, due to the spring-leg compression at mid-stance (Fig. 4).  
335 Contact times calculated in the simulation during walking and grounded running are below those  
336 obtained experimentally (w.: 15% less and g.r.: 25% less), while those observed and calculated for  
337 running agree (Table 2). Moreover, double support phases, expressed as percent of the stance time, are  
338 overestimated in simulations (experimentally: w.: 25% and g.r.: 21%; simulation: w.: 39% and g.r.: 23  
339 %).

#### 340 *Gait related changes in local parameters*

341 *Joint angles* displayed similar angle profiles in all gaits. Except for the tarsometatarso-phalangeal joint  
342 all other joints were more extended at TD with increasing speed (walking, grounded-running, running)  
343 (Fig.7). The *hip joint* underwent a gravity induced flexion at TD as body weight was shifted to the  
344 supporting leg. Then it was extended until the end of the stance phase. The *knee joint* was flexed until  
345 ca. 60% of stance, and then flexion was kept constant up to 90% of stance. In gaits with double  
346 support the knee was then further flexed until TO. The *intertarsal joint* was flexed in the early stance  
347 phase, and then extended up to 90% of stance, where the joint was again flexed until TO in the gaits  
348 with double support. Interestingly, both knee and intertarsal joints start with the same joint angle in  
349 each gait. The *tarsometatarso-phalangeal joint* was flexed in all gaits until ca. 85% of stance and  
350 afterwards extended quickly.

351 In Fig. 7 *joint external torques* during stance estimated for walking, grounded running, and running are  
352 presented. In the knee joint a sinusoidal torque pattern was observed, i.e. the torque alters sign during  
353 stance and must be compensated by flexors in the first half of the stance and then by extensors. All  
354 other joints presented a half-sine torque time relationship and must be compensated by anti-  
355 gravitational extensors moments.

356 While transitioning from walking to grounded running, maximal joint torques increased significantly  
357 only for the hip and intertarsal joints. When comparing grounded running with running, maximal joint  
358 torques increased significantly for all joints with the most significant increment in the knee joint  
359 (61.6 %, Table 3).

360 The torque-angle loops for each joint are presented in Fig. 7. The intertarsal joint was the only joint

361 which displayed linear-like torque-angle relation at each gait, as expected for a rotational spring ( $M =$   
362  $k\theta$ ). Following the changes observed for the global stiffness, the rotational stiffness in the intertarsal  
363 joint decreased significantly from walking to grounded running. But between grounded running and  
364 running, it did not change (see table 3).

365

## 366 **Discussion**

367 The first goal of this paper was to analyze whether variations in leg stiffness in quail, a representative  
368 small terrestrial bird, relates to the predictions of the (B)SLIP model, when they change gait as speed  
369 increases. The second goal was to infer the contribution of each joint to the global spring-like behavior  
370 of the legs in these small birds.

371

### 372 *Global parameters related to the SLIP and BSLIP model*

373 When quails switch gait from walking to grounded running or from grounded running to running, they  
374 roughly adapt leg stiffness following the (B)SLIP model. As expected, global leg stiffness in quails  
375 decreases when they change from vaulting to bouncing mechanics, and increases again during  
376 bouncing mechanics as they increase speed. Deviations from a Hookean (linear) spring are obvious  
377 especially during walking (Fig.4 right side, above). Nevertheless, our experimental and simulation  
378 results indicate that these small birds' locomotion approximates spring-like leg behavior in all gaits.  
379 This includes slow walking speeds, at which we obtained three peaks in the shape of the vertical GRF  
380 trace, which until now were only predicted by simulations (Geyer et al., 2006). Contrarily, in walking  
381 humans strong deviations occur from the spring-like leg behavior (Lipfert et al., 2012). Small birds  
382 walk and run with a more crouched posture favoring a compliant leg behavior (Gatesy and Biewener,  
383 1991; Andrada et al., 2012; Stoessel and Fischer, 2012; this paper). Although torques are relatively  
384 higher for crouched legs, the demand for high speed and/or acceleration distance per step, i.e., high  
385 locomotor performances (Günther et al., 2004), or the need to cope with rough terrain (Daley and  
386 Usherwood, 2010; Birn-Jeffery and Daley, 2012; Andrada et al., in press), may be criteria enforcing  
387 such a leg configuration. In humans or other larger animals, swing leg inertia and decrease of effective  
388 mechanical advantage (ratio of the extensor muscle moment arm to the moment arm of the GRF;  
389 Biewener, 1989) prevent such postures during locomotion, and grounded running is mostly avoided.  
390 Accordingly, higher stiffness and more extended legs are observed (e.g., humans  $\hat{k} > 40$  (Lipfert et  
391 al., 2012) vs.  $\hat{k} \cong 6$  in quails at comparable Froude numbers representing walking). The weight of the  
392 body induces an almost seven times higher compression in a quail than in a human. Interestingly,  
393 quails seem to use the same global leg stiffness during walking and running. Certainly, the more  
394 extended leg (increased  $l_0$ ) in running is one of the factors which produced an increase of the  
395 dimensionless global leg stiffness (see *joint stiffness vs. global leg stiffness*). In a system dominated by  
396 the series compliance of passive structures the possibilities of actuators to increase stiffness are largely

397 reduced. This may be one of the reasons why quails, and probably other small birds, do not usually use  
398 aerial running gaits, favoring instead grounded running.

399

400 While the angle of attack remains unaltered over the three gaits, in gaits with double contact phases,  
401 the aperture angle seems to be a variable that is tuned (Andrada et al., in press). Theoretical models  
402 show that grounded running simulated with an aperture angle strategy is less unstable and less  
403 sensitive to inaccuracies in angle tuning than the same model simulated with the angle of attack  
404 (Andrada et al., 2012; Andrada et al., in press).

405

406 Contrarily to the expectation of the spring-mass model, in which the vectors of the GRF always point  
407 to the CoM, our results show more vertically oriented forces. This vertical orientation is likely to be  
408 produced by hip torques necessary to balance the trunk. In simulations Maus and colleagues did show,  
409 that if GRF are directed to a point located above the CoM during stance, trunk posture can be  
410 stabilized (Maus et al., 2010). In addition a more vertical oriented GRF may result in reduced energy  
411 consumption, as elegantly presented by Usherwood and Hubel (2012). In running, torques about the  
412 CoM during stance can—with nonzero body pitch moments of inertia—reduce the mechanical work of  
413 supporting body weight by reducing horizontal forces, and thus fore–aft energy fluctuations  
414 (Usherwood and Hubel, 2012). The additional cost of balancing the trunk may be compensated for by  
415 a reduced cost to drive the energy fluctuations of the CoM.

416 We are aware that our method for determining stiffness (see methods and Fig. 3), especially during  
417 walking, may underestimate this parameter as non-linearities increase. Yet this method is easy to be  
418 implemented as just the vertical component of the GRF is needed. Moreover, in a different stance time  
419 leg force is overestimated as it does not point to the CoM (Fig. 6). Finally, our simulations match the  
420 quails' leg length variation and contact times reasonably well. Higher stiffness values using the linear  
421 BSLIP template would certainly diminish matching of those parameters.

422

### 423 *Joint torques*

424 Net limb joint torques in humans and quadrupedal mammals generally reflect the need to counteract  
425 gravity (Winter, 1995; Witte et al., 2002; Nyakatura and Andrada, 2013). Necessary extensor torques  
426 result from the 'anti-gravity role' of limb joint extensors to prevent gravity induced limb collapse  
427 during weight bearing (Cohen and Gans, 1975; Jenkins and Weijs, 1979; Goslow et al., 1981). With  
428 the only exception of the knee, which shows a biphasic torque pattern, external torque results obtained  
429 for hip, ITJ, and TMTJ in the quail agree with these observations. Knee torques and joint angles  
430 estimated for walking, grounded running and running indicate that the knee is actively flexed from TD  
431 until after mid-stance by the knee flexors and not only by gravity (Fig. 7). The change from flexor to  
432 extensor moment occurs earlier as the speed increases. Thus, the active flexion of the knee may  
433 contribute to body propulsion. After mid-stance, the extensor torque in the knee may work against

434 gravity, while the hip adopts the role of body propulsion as soon as the vector of the GRF is pointed  
435 behind the CoM. Interestingly, Stoessel and Fischer (2012) showed that when speed is increased, the  
436 relative kinematic contribution of the knee to the step decreases while that of the hip and ITJ increases.  
437 These results agree to some degree with the kinematic notion, that striding bipedalism in extant birds  
438 at slow speeds may be characterized as knee-driven (e.g. Gatesy, 1999; Hutchinson and Allen, 2009).  
439 The knee-driven mechanism is often linked to a more cranially positioned CoM and a more horizontal  
440 oriented femur (Gatesy, 1999; Hutchinson and Allen, 2009) in birds in comparison with humans.

441

442 The increased knee flexion observed may be explained by the action of the biarticular *M.*  
443 *gastrocnemius* in combination with the bird specific leg geometry. In birds, the lateral gastrocnemius  
444 muscle (LG) solely flexes the knee (Higham et al., 2008). The crouched posture increases the moment  
445 arm of this muscle. Consequently, the knee joint is more susceptible to flexion from flexor muscle  
446 activity. To antagonize this effect in the late stance, the modulation of the joint stiffness has to be  
447 achieved by knee extensor muscles, as for example, the medial part of the gastrocnemius muscle (MG;  
448 see below and (Higham et al., 2008)), *M. femoro-tibialis* or *M. ilio-tibialis*. Flexor knee torques in the  
449 early stance phase were also observed in running guinea fowl (Daley et al., 2007) and ostriches  
450 (Rubenson et al., 2010). Ostriches have more extended legs, and the knee is only flexed until ca. 20%  
451 of the stance followed by a strong extension (see Rubenson et al., 2007, Rubenson et al., 2010). In  
452 human locomotion depending on the knee joint angle, the MG may act as a knee flexor or as a knee  
453 extensor (Ertelt et al., 2011). At knee joint angles between 150° and 180° Ertelt et al., 2011 observed  
454 that the MG works as a knee extensor, but below 150° the contraction of this muscle will work against  
455 knee extension. Thus, the extended leg in humans prevents the knee flexing action of MG and it may  
456 even extend the knee. Contrarily, the medial head of the avian gastrocnemius generally wraps right  
457 around the knee and is a knee extensor even at flexed knee angles (Higham et al., 2008). However, the  
458 insertions of the LG and MG act about the ankle joint via a common tendon. Thus, the contraction of  
459 both parts of *M. gastrocnemius* extends the ITJ joint, for which - together with the hip joint - we found  
460 the biggest extensor torques.

461

462 Our findings show that, on average, bouncing leg behavior demands significant higher torques in the  
463 hip (13.0%) and intertarsal (18.7%) joints in respect to vaulting leg behavior. These increments,  
464 however seem to be relative moderate if we take into account that the speed increased between these  
465 two gaits on average by about 70%. Obviously, grounded running offers the advantage of long step  
466 lengths and contact times, increasing the distribution of ground reaction forces. The result is a  
467 reduction in peak reaction forces and thus joint torques compared to gaits which feature greater limb  
468 stiffness and/or aerial phases. Energy storage and the reduction in peak force in grounded running may  
469 thus help to reduce the cost of locomotion. In contrast, the decrease in the effective mechanical  
470 advantage of the musculature may cancel out this effect (McMahon et al., 1987; Biewener, 1989).

471 When quails run with aerial phases maximal joint torques increase significantly. Our results show that  
472 the most important relative increment occurs, surprisingly, in the knee joint. This is likely to be  
473 produced, by the significant increased force generated by the LG during running (Higham et al., 2008)  
474 needed to cope with higher flexing moments in the ITJ joint.

475

476

#### 477 *Joint stiffness vs. global leg stiffness*

478 We hypothesized the intertarsal joint (ITJ) and the tarsometatarso-phalangeal joint (TMTJ) to be  
479 responsible in tuning global leg stiffness. Contrarily to our assumptions, the TMTJ did not display  
480 quasi-linear torque-angle relation, as expected for a rotational spring. This was only observed for the  
481 intertarsal joint. The latter can largely explain the changes observed for the global leg stiffness  
482 between walking and grounded running. Comparing the mean values of each gait presented in tables 2  
483 and 3, the rotational stiffness in the intertarsal joint decreased about 20% while the overall leg stiffness  
484 decreased about 14%. On the other hand, the ITJ stiffness estimated for running did not differ from  
485 those obtained for grounded running, while the leg stiffness increased about 23% between these two  
486 gaits. This may indicate that the ITJ changes gradually between two behaviors, namely vaulting and  
487 bouncing. The observed increase may also be a cumulative result of the action of non-linearities  
488 among leg joints. The more extended leg is one of the factors which produced an increment of the  
489 dimensionless leg stiffness. First, the observed  $l_0$  increase (about 8%) can explain partially the increase  
490 of 20% in the dimensionless leg stiffness between these gaits. The second component may be the  
491 result of a more extended knee. Farley and colleges discussed that the ankle stiffness is affected by the  
492 knee angle at TD which changes the activation of the *M. gastrocnemius*, *M. tibialis anterior* or *M.*  
493 *soleus* (Farley et al., 1998). Thus a more extended knee, as observed in our results, may result in an  
494 increase in *M. gastrocnemius* force without necessity of changes in the activation of that muscle  
495 (Müller et al., 2010). In addition, the more extended leg during running increases the effective  
496 mechanical advantage (Biewener et al., 2004). If activation is not altered, this results in an automatic  
497 increment in leg stiffness (Blickhan et al., 2007). Therefore, our results indicate that an important part  
498 of the leg stiffness adjustment process may rely on the leg geometry at TD, as already hypothesized  
499 (Grimmer et al., 2008; Müller and Blickhan, 2010). In this respect, morphological, electromyography  
500 (EMG) as well simulation studies are needed to understand how leg geometry and joint non-linear  
501 behavior contributes to a linear-like leg stiffness.

502

503

504

505

506

507

508 **Conclusion**

509 Quail terrestrial locomotion globally approximates a linear-like spring-like behavior at all investigated  
510 gaits (walking, grounded running, and running), correlated with the predictions of the (B)SLIP model.  
511 This includes slow walking which is characterized by a three hump curve in the vertical GRF, as  
512 predicted by the BSLIP (Geyer et al., 2006). Trunk balance during all gaits seems to be an important  
513 issue and thus GRFs are, contrarily to the telescopic expectation of the (B)SLIP model, more vertically  
514 oriented. As previously observed, swing leg behavior is highly conserved during all gaits (e.g., Gatesy  
515 and Biewener, 1991; Nyakatura et al., 2012; Stoessel and Fischer, 2012), while the retraction of the  
516 stance leg (e.g., Gatesy and Biewener, 1991; Nyakatura et al., 2012; Stoessel and Fischer, 2012), and  
517 therefore the aperture angle (Andrada et al., 2012; Andrada et al., in press) is adapted as speed  
518 increases. At the local level, practically all the spring like work was found to occur in the ITJ, while  
519 the active knee flexion is more likely to help in the regulation of the leg retraction. Contrarily to the  
520 results from Rubenson and colleagues (Rubenson et al., 2010) from ostriches, the TMTPJ in quails  
521 displayed no spring-like behavior. This may highlight a difference between large and small birds.  
522 Finally, our results show that between walking and grounded running the stiffness in the ITJ decreases  
523 in a similar way to the diminution observed in the global leg stiffness. Thus, in gaits without aerial  
524 phases the ITJ stiffness significantly regulates overall leg stiffness. Accordingly, global leg  
525 compression increased to exert higher vertical GRFs at mid-stance during grounded running compared  
526 to walking.

527

528 Higher global leg compression and thus higher leg forces permits quails to introduce aerial phases, and  
529 leg stiffness is increased (to values which are not significantly different to those obtained during  
530 walking) to cope with the decreasing contact times. However, the stiffness in the ITJ does not change  
531 from grounded running to running. Here, the more extended leg at TD adds to the notion that an  
532 important part of the leg stiffness adjustment process in running may rely on the leg geometry at TD,  
533 controlled by the joint angles in knee and ITJ.

534

535

536 **Acknowledgments:** We thank Roy Müller for stimulating and helpful discussions that lead to the first  
537 manuscript of this work. We thank our colleagues Vivian Allen, Brandon Kilbourne, and Alexander  
538 Stoessel for providing helpful critique on early drafts of the manuscript. Rommy Petersohn and Ingrid  
539 Weiß helped with X-ray data acquisition. Three reviewers' comments helped to improve and clarify  
540 the manuscript. Figure 3 is based on a sketch provided by Rev.#3 and the Editor (AA Biewener). This  
541 research was supported by DFG (German Research Council) grants Bl 236/22-1 and Fi 410/15-1.

542



543 **References:**

- 544 **Abourachid, A. and Renous, S.** (2000). Bipedal locomotion in ratites (Paleognathiform): examples of  
545 cursorial birds. *Ibis* **142**, 538-549.
- 546 **Abourachid, A., Hackert, R., Herbin, M., Libourel, P. A., Lambert, F., Gianni, H., Provini, P.,**  
547 **Blazevic, P. and Hugel, V.** (2011). Bird terrestrial locomotion as revealed by 3D kinematics. *Zool* **114**,  
548 360-368.
- 549 **Ahn, A. N., Furrow, E. and Biewener, A. A.** (2004). Walking and running in the red-legged running  
550 frog, *Kassina maculata*. *J Exp Biol* **207**, 399-410.
- 551 **Andrada, E., Rode, C. and Blickhan, R.** (in press). Grounded running in quails: simulations indicate  
552 benefits of observed fixed aperture angle between legs before touch-down. *J Theor Biol*.
- 553 **Andrada, E., Nyakatura, J. A., Müller, R., Rode, C. and Blickhan, R.** (2012). Grounded Running: An  
554 Overlooked Strategy for Robots. In *Autonomous Mobile Systems 2012*, pp. 79-87: Springer Berlin  
555 Heidelberg.
- 556 **Arampatzis, A., Bruggemann, G. P. and Metzler, V.** (1999). The effect of speed on leg stiffness and  
557 joint kinetics in human running. *J Biomech* **32**, 1349-1353.
- 558 **Biewener, A. A.** (1989). Scaling body support in mammals: limb posture and muscle mechanics.  
559 *Science* **245**, 45-48.
- 560 **Biewener, A. A., Farley, C. T., Roberts, T. J. and Temaner, M.** (2004). Muscle mechanical advantage  
561 of human walking and running: implications for energy cost. *J Appl Physiol* **97**, 2266-2274.
- 562 **Birn-Jeffery, A. V. and Daley, M. A.** (2012). Birds achieve high robustness in uneven terrain through  
563 active control of landing conditions. *J Exp Biol* **215**, 2117-2127.
- 564 **Blickhan, R.** (1989). The spring-mass model for running and hopping. *J Biomech* **22**, 1217-1227.
- 565 **Blickhan, R. and Full, R.J.** (1992). Mechanical work in terrestrial locomotion. In: *Biomechanics -*  
566 *Structures and Systems* (ed. AA Biewener). Oxford University Press. Pp: 75-96
- 567 **Blickhan, R., Seyfarth, A., Geyer, H., Grimmer, S., Wagner, H. and Gunther, M.** (2007). Intelligence  
568 by mechanics. *Philos Transact A Math Phys Eng Sci* **365**, 199-220.
- 569 **Cavagna, G. A., Heglund, N. C. and Taylor, C. R.** (1977). Mechanical work in terrestrial locomotion:  
570 two basic mechanisms for minimizing energy expenditure. *Am J Physiol* **233**, R243-261.
- 571 **Cohen, A. H. and Gans, C.** (1975). Muscle activity in rat locomotion: movement analysis and  
572 electromyography of the flexors and extensors of the elbow. *J Morphol* **146**, 177-196.
- 573 **Daley, M. A. and Biewener, A. A.** (2003). Muscle force-length dynamics during level versus incline  
574 locomotion: a comparison of in vivo performance of two guinea fowl ankle extensors. *J Exp Biol* **206**,  
575 2941-2958.
- 576 **Daley, M. A. and Usherwood, J. R.** (2010). Two explanations for the compliant running paradox:  
577 reduced work of bouncing viscera and increased stability in uneven terrain. *Biol. Lett.* **6**, 418-421.
- 578 **Daley, M. A., Felix, G. and Biewener, A. A.** (2007). Running stability is enhanced by a proximo-distal  
579 gradient in joint neuromechanical control. *J Exp Biol* **210**, 383-394.
- 580 **Daley, M. A., Usherwood, J. R., Felix, G. and Biewener, A. A.** (2006). Running over rough terrain:  
581 guinea fowl maintain dynamic stability despite a large unexpected change in substrate height. *J Exp*  
582 *Biol* **209**, 171-187.
- 583 **Ertelt, T., Ertelt, H. J. and Blickhan, R.** (2011). The Geometry-Critical Functional Dependence of M.  
584 Gastrocnemius. *Int J Appl Mech* **03**, 85-98.
- 585 **Farley, C. T. and Morgenroth, D. C.** (1999). Leg stiffness primarily depends on ankle stiffness during  
586 human hopping. *J Biomech* **32**, 267-273.
- 587 **Farley, C. T., Glasheen, J. and McMahon, T. A.** (1993). Running springs: speed and animal size. *J Exp*  
588 *Biol* **185**, 71-86.
- 589 **Farley, C. T., Houdijk, H. H. P., Van Strien, C. and Louie, M.** (1998). Mechanism of leg stiffness  
590 adjustment for hopping on surfaces of different stiffnesses. *J Appl Physiol* **85**, 1044-1055.
- 591 **Ferris, D. P., Liang, K. and Farley, C. T.** (1999). Runners adjust leg stiffness for their first step on a  
592 new running surface. *J Biomech* **32**, 787-794.

593 **Full, R. J., Koditschek, D. E.** (1999). Templates and anchors: neuromechanical hypotheses of legged  
594 locomotion on land. *J. Exp. Biol.* **202**, 3325-3332.

595 **Gatesy, S. M.** (1999). Guineafowl hind limb function. I: Cineradiographic analysis and speed effects. *J*  
596 *Morphol* **240**, 115-125.

597 **Gatesy, S. M. and Biewener, A. A.** (1991). Bipedal locomotion: effects of speed, size and limb posture  
598 in birds and humans. *J Zool* **224**, 127-147.

599 **Geyer, H., Seyfarth, A. and Blickhan, R.** (2006). Compliant leg behaviour explains basic dynamics of  
600 walking and running. *Proc. R. Soc. B* **273**, 2861-2867.

601 **Goslow, G. E., Seeherman, H. J., Taylor, C. R., McCutchin, M. N. and Heglund, N. C.** (1981). Electrical  
602 activity and relative length changes of dog limb muscles as a function of speed and gait. *J Exp Biol* **94**,  
603 15-42.

604 **Grimmer, S., Ernst, M., Günther, M. and Blickhan, R.** (2008). Running on uneven ground: leg  
605 adjustment to vertical steps and self-stability. *J Exp Biol* **211**, 2989-3000.

606 **Gunther, M., Keppler, V., Seyfarth, A. and Blickhan, R.** (2004). Human leg design: optimal axial  
607 alignment under constraints. *J Math Biol* **48**, 623-646.

608 **Hancock, J. A., Stevens, N. A. and Biknevicius, A. R.** (2007). Whole-body mechanics and kinematics  
609 of terrestrial locomotion in the Elegant-crested Tinamou. *Eudromia elegans. Ibis* **149**, 605-614.

610 **He, J. P., Kram, R. and McMahon, T. A.** (1991). Mechanics of running under simulated low gravity. *J*  
611 *Appl Physiol* **71**, 863-870.

612 **Heglund, N. C., Cavagna, G. A., Taylor, C. R.** (1982). Energetics and mechanics of terrestrial  
613 locomotion. III. Energy changes of the centre of mass as a function of speed and body size in birds  
614 and mammals. *J. Exp. Biol.* **97**, 41-56.

615 **Higham, T. E., Biewener, A. A. and Wakeling, J. M.** (2008). Functional diversification within and  
616 between muscle synergists during locomotion. *Biol Lett* **4**, 41-44.

617 **Hutchinson, J. R. and Allen, V.** (2009). The evolutionary continuum of limb function from early  
618 theropods to birds. *Naturwissenschaften* **96**, 423-448.

619 **Jenkins, P. A. and Weijs, W. A.** (1979). The functional anatomy of the shoulder in the Virginia  
620 opossum (*Didelphis virginiana*). *J Zool* **188**, 379-410.

621 **Kerdok, A. E., Biewener, A. A., McMahon, T. A., Weyand, P. G. and Herr, H. M.** (2002). Energetics  
622 and mechanics of human running on surfaces of different stiffnesses. *J Appl Physiol* **92**, 469-478.

623 **Kuitunen, S., Komi, P. V. and Kyröläinen, H.** (2002). Knee and ankle joint stiffness in sprint running.  
624 *Med sci sports exerc* **34**, 166-173.

625 **Lipfert, S. W., Günther, M., Renjewski, D., Grimmer, S. and Seyfarth, A.** (2012). A model-experiment  
626 comparison of system dynamics for human walking and running. *J Theor Biol* **292**, 11-17.

627 **Maus, H. M., Lipfert, S. W., Gross, M., Rummel, J. and Seyfarth, A.** (2010). Upright human gait did  
628 not provide a major mechanical challenge for our ancestors. *Nat Commun* **1**, 70.

629 **McMahon, T. A., Valiant, G. and Frederick, E. C.** (1987). Groucho running. *J Appl Physiol* **62**, 2326-  
630 2337.

631 **Moritz, C. T., Greene, S. M. and Farley, C. T.** (2004). Neuromuscular changes for hopping on a range  
632 of damped surfaces. *J Appl Physiol* **96**, 1996-2004.

633 **Muller, R. and Blickhan, R.** (2010). Running on uneven ground: leg adjustments to altered ground  
634 level. *Hum Mov Sci* **29**, 578-589.

635 **Muller, R., Grimmer, S. and Blickhan, R.** (2010). Running on uneven ground: leg adjustments by  
636 muscle pre-activation control. *Hum Mov Sci* **29**, 299-310.

637 **Nudds, R. L., Folkow, L. P., Lees, J. J., Tickle, P. G., Stokkan, K. A. and Codd, J. R.** (2011). Evidence for  
638 energy savings from aerial running in the Svalbard rock ptarmigan (*Lagopus muta hyperborea*). *Proc.*  
639 *R. Soc. Lond. B* **278**, 2654-2661.

640 **Nyakatura, J. A. and Andrada, E.** (2013). A mechanical link model of two-toed sloths: no pendular  
641 mechanics during suspensory locomotion. *Acta Theriol* **58(1)**, 83-93.

642 **Nyakatura, J. A., Andrada, E., Grimm, N., Weise, H. and Fischer, M. S.** (2012). Kinematics and Center  
643 of Mass Mechanics During Terrestrial Locomotion in Northern Lapwings (*Vanellus vanellus*,  
644 Charadriiformes). *J Exp Zool A Ecol Genet Physiol* **317**, 580-594.

645 **Rubenson, J., Heliams, D. B., Lloyd, D. G. and Fournier, P. A.** (2004). Gait selection in the ostrich:  
646 mechanical and metabolic characteristics of walking and running with and without an aerial phase.  
647 *Proc. R. Soc. Lond. B* **271**, 1091-1099.

648 **Rubenson, J., Lloyd, D. G., Besier, T. F., Heliams, D. B., and Fournier, P. A.** (2007). Running in  
649 ostriches (*Struthio camelus*): three-dimensional joint axes alignment and joint kinematics. *J Exp Biol*  
650 **210**, 2548-2562. doi:10.1242/jeb.02792

651 **Rubenson, J., Lloyd, D. G., Heliams, D. B., Besier, T. F. and Fournier, P. A.** (2010). Adaptations for  
652 economical bipedal running: the effect of limb structure on three-dimensional joint mechanics. *J R*  
653 *Soc Interface* **8**, 740-755.

654 **Seyfarth, A., Geyer, H. and Herr, H.** (2003). Swing-leg retraction: a simple control model for stable  
655 running. *J Exp Biol* **206**, 2547-2555.

656 **Stoessel, A. and Fischer, M. S.** (2012). Comparative intralimb coordination in avian bipedal  
657 locomotion. *J Exp Biol* **215**, 4055-4069.

658 **Usherwood, J. R. and Hubel, T. Y.** (2012). Energetically optimal running requires torques about the  
659 centre of mass. *J R Soc Interface* **9**, 2011-2015.

660 **Winter, D. A.** (1995). *Biomechanics and Motor Control of Human Movement*. New York: John Wiley  
661 and Sons.

662 **Witte, H., Biltzinger, J., Hackert, R., Schilling, N., Schmidt, M., Reich, C. and Fischer, M. S.** (2002).  
663 Torque patterns of the limbs of small therian mammals during locomotion on flat ground. *J Exp Biol*  
664 **205**, 1339-1353.

665

666

667

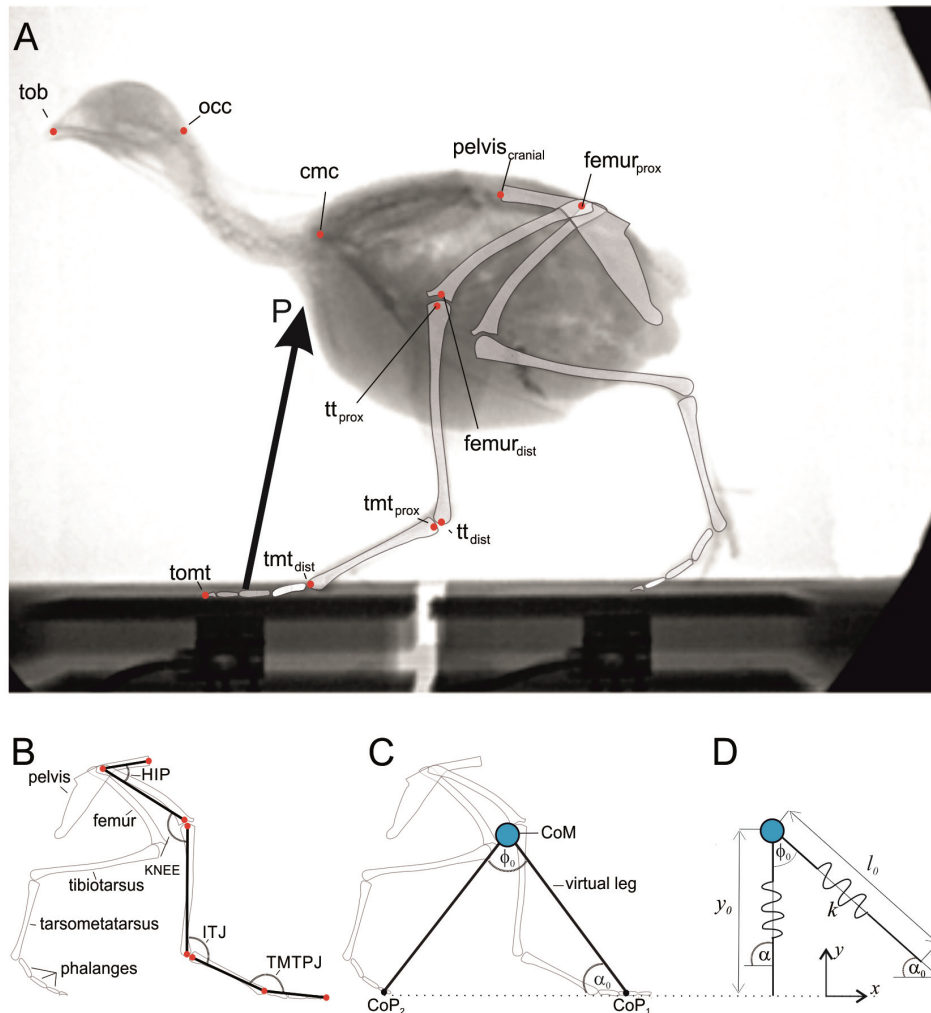

669

670 **Figure 1.** Latero-lateral X-ray projection of a quail traversing the two custom-built force plates to obtain single  
 671 limb kinetic data. Schematic drawing superimposed to X-ray still image depicting all used landmarks (A) and  
 672 two dimensional representation to measure joint angles (B). P: instantaneous ground reaction force vector; ITJ,  
 673 intertarsal joint; TMTJP, tarsometatarso-phalangeal joint; tob, tip of beak; occ, occiput; cmc, caudalmost cervical  
 674 vertebrae; tomt, tip of middle toe. The TMTJP was represented by one point (tmt<sub>dist</sub>) due to the spatial resolution  
 675 of the X-ray image. (C) Virtual legs at touch-down (segments CoP<sub>1</sub>-CoM-CoP<sub>2</sub>).  $\alpha_0$ : angle of attack, and  $\phi_0$ :  
 676 aperture angle at touch-down. (D) Bipedal Spring Loaded Inverted Pendulum (BSILP) template.  $k$ : stiffness,  $\alpha$ :  
 677 leg angle respect to the ground,  $l_0$ : rest length,  $y_0$ : initial high.

678

679

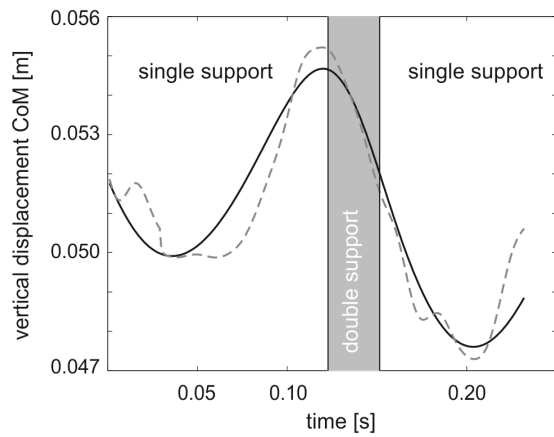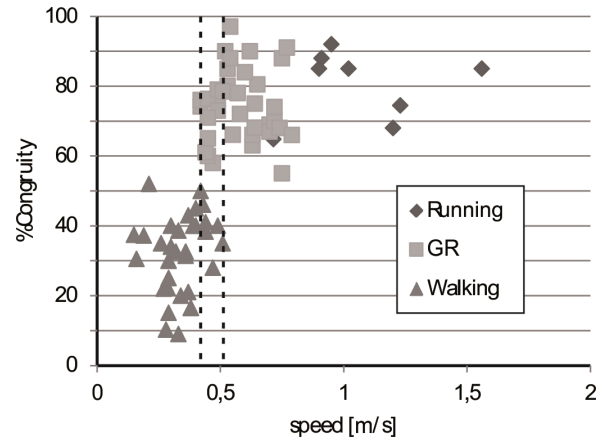

680  
681

682 **Figure 2.** A) Estimation of vertical displacement of the CoM for a grounded running trial of a quail (grey dashed  
683 line: by combining kinematics and cadaveric information; black solid line: by using integration of GRF). B)  
684 %Congruity vs. speed. %Congruity was used to distinguish between walking and running gaits. We defined  
685 walking for %Congruity values < 50 and running for %Congruity values > 50. Trials with a % Congruity close  
686 to 50% were further analyzed to differentiate walking and running (shape of GRF, vertical speed change close to  
687 mid-stance, see methods). Vertical dashed lines depict overlapping speeds where walking and grounded running  
688 occur.

689  
690  
691  
692  
693  
694  
695  
696  
697  
698  
699  
700  
701  
702  
703  
704  
705  
706  
707  
708  
709  
710  
711  
712

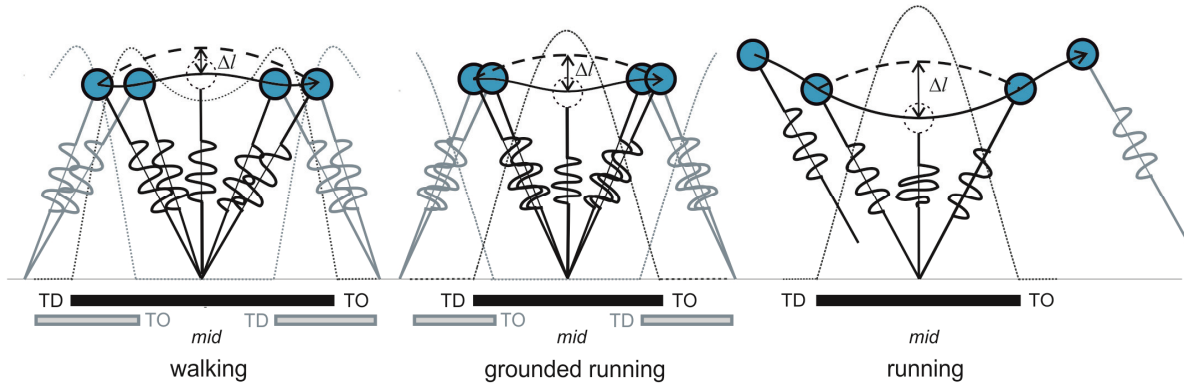

713

714

715 **Figure 3.** Estimating single-leg stiffness  $k$  during walking, grounded running and running, based on the BSLIP  
 716 template (black: leg 1, grey: leg 2). At touchdown (TD) and at take-off (TO) events, the "virtual leg" linking the  
 717 CoM with the CoP is equivalent to the rest length of a spring  $l_0$ ; during stance, the virtual leg length is  
 718 compressed to exert the leg's GRF. The dashed arcs show the trajectory of  $l_0$ , the solid curves the trajectory of  
 719 the CoM, and the dotted curves represent the vertical component of the GRF. For all three gaits, the stiffness  $k$   
 720 can be estimated, assuming linear behavior, as  $k = GRF/\Delta l$ . By choosing mid-stance (*mid*), only the vertical  
 721 component of the  $GRF$  and  $\Delta l$  are needed to estimate it. Note that although stiffness is measured for single legs,  
 722 the model is bipedal for walking as well as for grounded running.

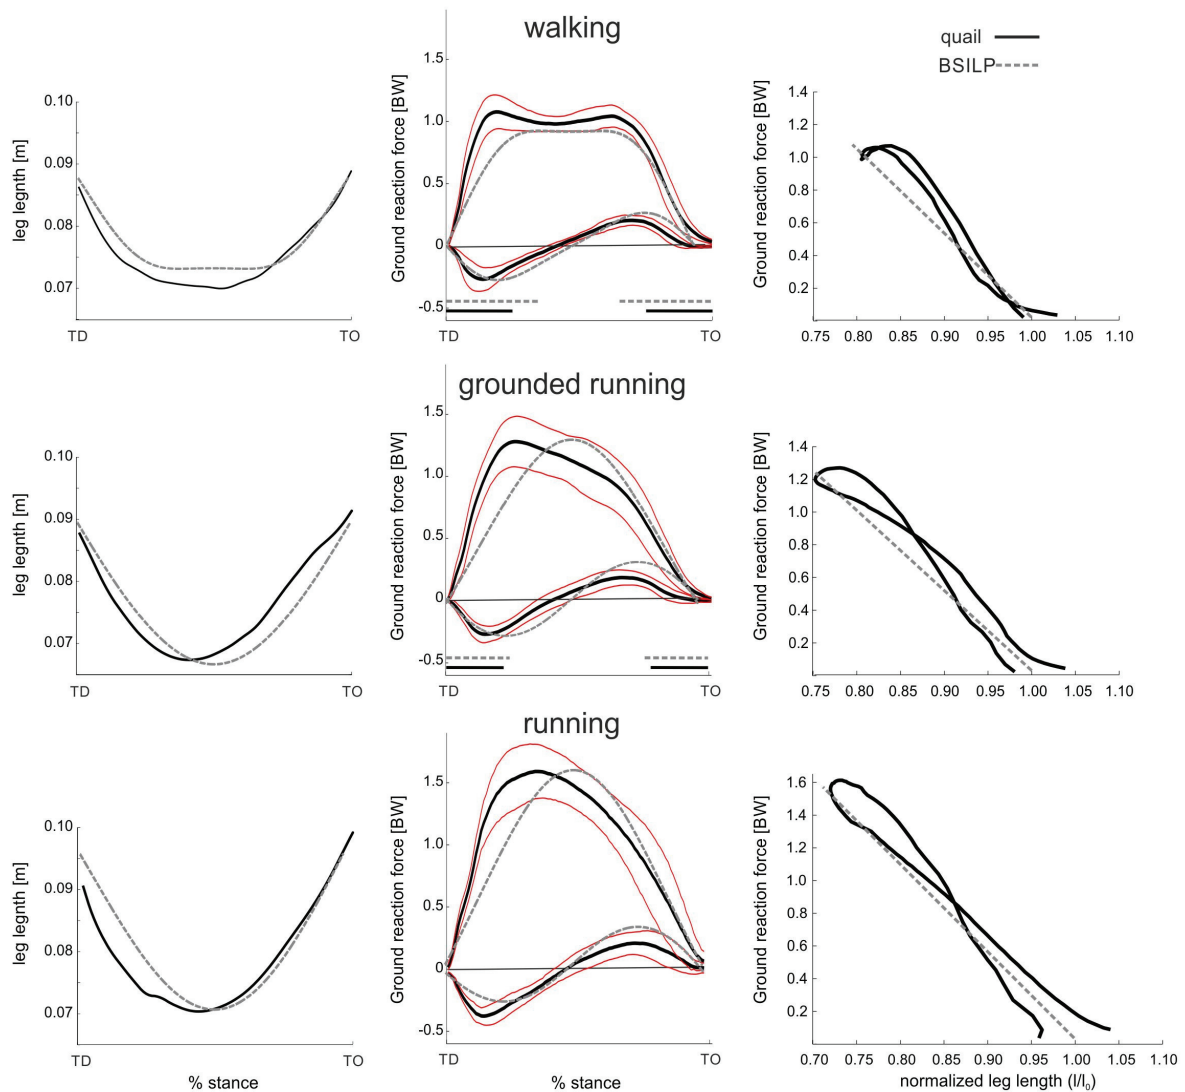

723

724

725 **Figure 4.** Global leg parameters during terrestrial locomotion of the quail vs. BSLIP simulation predictions.

726 Solid lines represent experimental findings. Grey dashed lines BSLIP model. Leg length variation (left), vertical

727 and anterior-posterior ground reaction forces (middle), and force-length plots (right) during walking (top),

728 grounded running (middle) and running (bottom). The GRF and force-length plots are presented as mean

729 (walking,  $n=32$ ; grounded running,  $n=34$ ; running,  $n=8$ ). GRF graphs includes also  $\pm 1$ s.d. Horizontal lines in the

730 GRF graphs represent relative double support phases (walking and grounded running). For the force-length plots,

731 resultant force is used.  $l_0$  in the force-length plots refers to the mean value of  $l_0$  for each gait (see table 2).

732 Simulations parameters: walking,  $v_{x0}=0.34m/s$ ,  $\hat{k} = 5.8$ ,  $l_0=0.087m$ ,  $E = 0.168J$ ,  $\alpha_0 = 58^\circ$ , grounded running:  $v_{0x}$

733  $= 0.59m/s$ ,  $\hat{k} = 5$ ,  $l_0=0.089m$ ,  $E = 0.191J$ ,  $\phi_0 = 65^\circ$ , running:  $v_{0x} = 1.06m/s$ ,  $\hat{k} = 6.2$ ,  $l_0=0.096m$ ,  $E = 0.286J$ ,  $\alpha_0$

734  $= 57^\circ$ . Caution is needed when interpreting results of simulations for walking: a less compressed spring-leg at

735 mid-stance would pronounce the vertical GRF's M-shape and simultaneously diminish the relative duration of

736 double support phases.

737

738

739

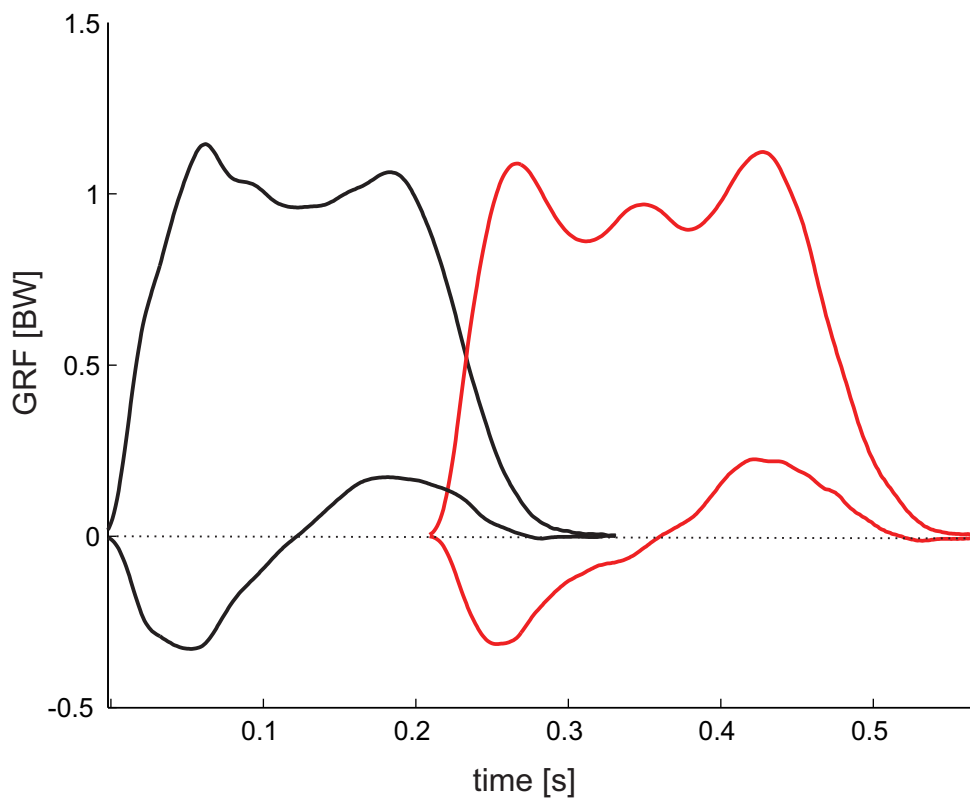

740  
741  
742  
743  
744  
745  
746

**Figure 5.** Vertical and anterior-posterior ground reaction forces obtained during slow walking. Note that vertical GFR obtained for the second stride show a three humped profile as predicted by the BSLIP model at slow speeds.



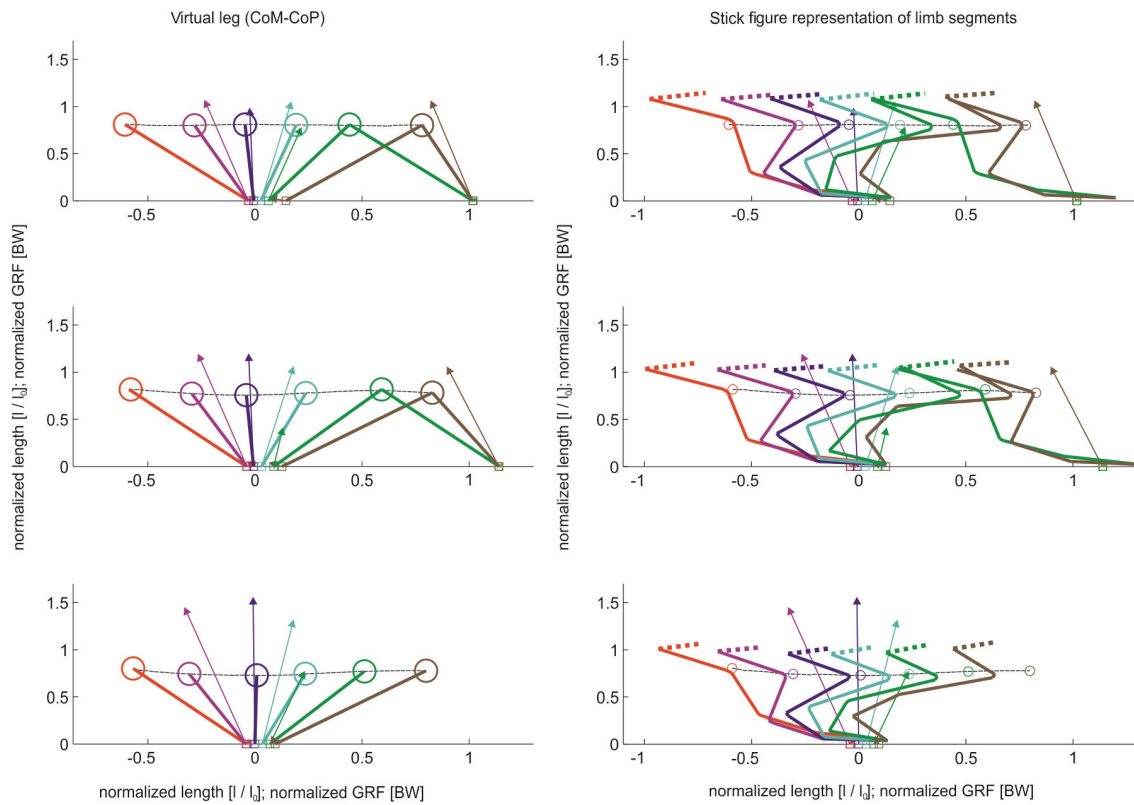

747

748 **Figure 6.** Virtual and stick figure representation of limb segments together with the orientation of the GRF

749 during walking (top, mean of 32 strides), grounded running (middle, mean of 34 strides), and running (bottom,

750 mean of 8 strides). Circles depict the position of the CoM. Segments were scaled by  $l_0$  and GRF by body weight.

751 Note that contrary to the (B)SLIP expectations, GRF are eccentric related to the virtual leg and the CoP is

752 displaced cranially during stance.

753

754

755

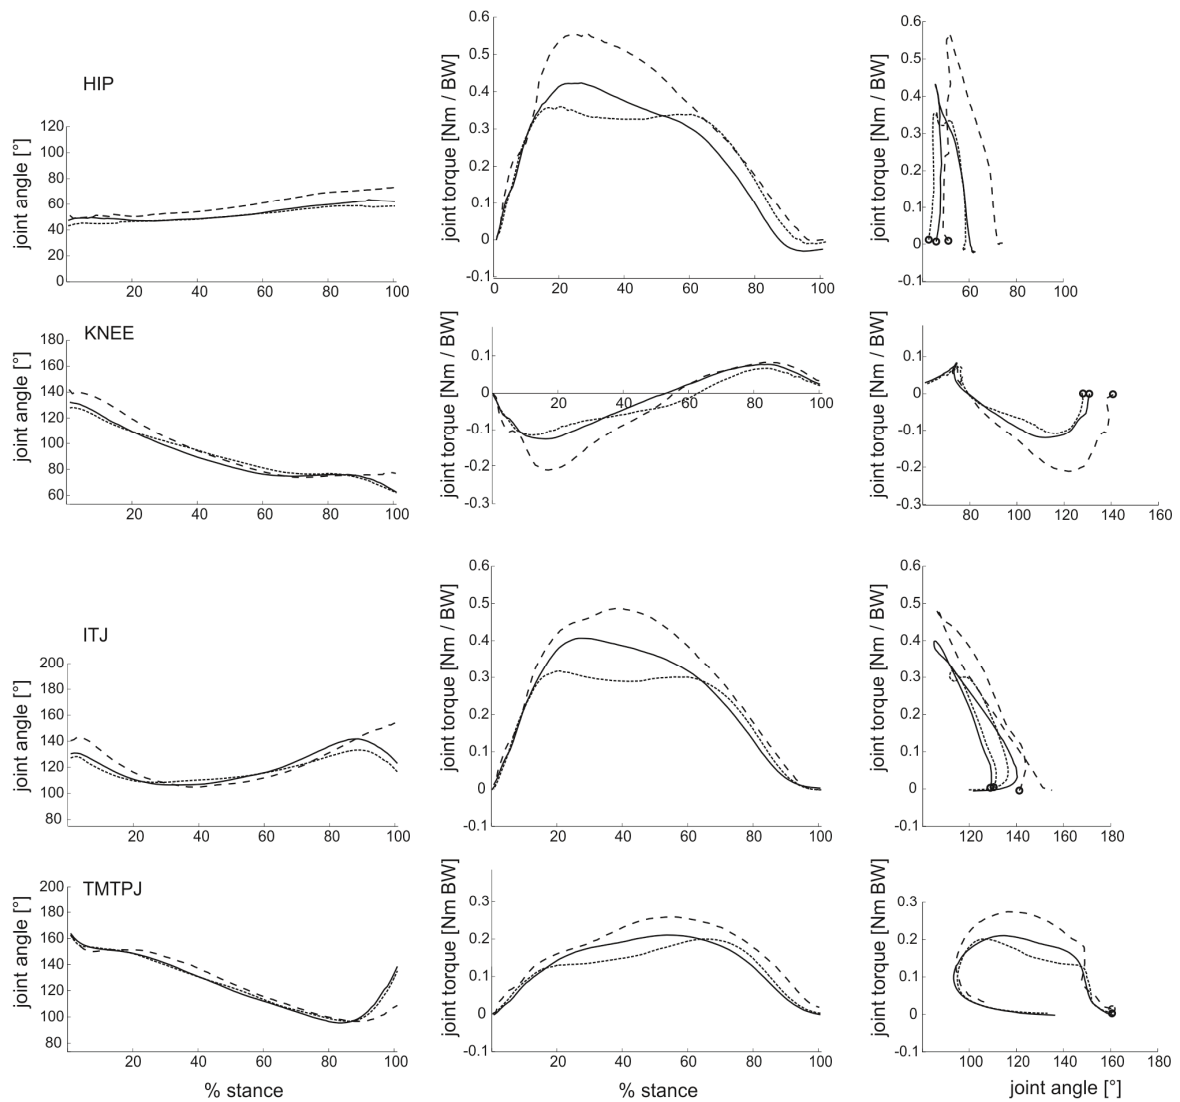

757

758 **Figure 7.** Local leg parameters (joint mechanics) during terrestrial locomotion of the quail (walking: dot-line,  
 759 grounded running: solid line, running: dashed-line). Joint angles (left), joint torques (middle), torque-angle plots  
 760 (right) over the course of the stance for the HIP, KNEE, ITJ, and TMTPJ. Displayed are mean values (walking:  
 761 32 strides, grounded running: 34 strides, running: 8 strides). Increasing joint angles indicate extension, and  
 762 positive values in the torques plots represent extensor torques. Circles indicate touch-down.

763

764

765

766

767

768 **Table 1:** Limb element and body part parameters of subject 6. Relative position (from proximal) of the  
 769 element's CoM is given as percentage of overall length. \*: value assumed; \*\*: the CoM position of the  
 770 trunk is more ventral than the line between the pygostyl and caudalmost cervical vertebra; \*\*\*: due to  
 771 movements of the head relative to the trunk the length of the neck changes during locomotion.  
 772

| element         | weight in g | % of total mass | length in cm | CoM position (%<br>of total segment<br>length) |
|-----------------|-------------|-----------------|--------------|------------------------------------------------|
| trunk           | 173.6       | 0.724           | 7.5          | 0.5, -0.307**                                  |
| head            | 7.5         | 0.031           | 4.4          | 0.328                                          |
| neck            | 17.7        | 0.074           | variable***  | 0.32                                           |
| femur (thigh)   | 11.1        | 0.046           | 4.1          | 0.483                                          |
| tibiotarsus     | 7.1         | 0.029           | 5.18         | 0.35                                           |
| tarsometatarsus | 1.6         | 0.007           | 3.5          | 0.5*                                           |
| toes            | 0.6         | 0.003           | 3.9          | 0.5*                                           |

773

774

775 **Table 2:** Gait related global leg parameters.  $\hat{k}$ : dimensionless global leg stiffness;  $l_0$ : rest length;  $\alpha_0$ :  
 776 angle of attack;  $\phi_0$ : aperture angle;  $\psi$ : dimensionless global leg compression; c.t. exp.: contact time in  
 777 experimental quail data; c. t. sim.: contact time in simulation ; d. s. exp.: double support time in  
 778 experimental quail data; d. s. sim.: double support time in simulation (mean  $\pm$  1 s.d.; p: significance t-  
 779 test <0.05).  
 780

| parameter      | walking             | n  | grounded<br>running | n  | running            | n | p<br>w. vs g.r. | p<br>w. vs r. | p<br>g.r. vs r. |
|----------------|---------------------|----|---------------------|----|--------------------|---|-----------------|---------------|-----------------|
| $\hat{k}$      | 5.77 $\pm$ 1.25     | 32 | 4.99 $\pm$ 0.67     | 34 | 6,15 $\pm$ 0.62    | 8 | 0.004           | 0.432         | <.001           |
| $l_0$ [m]      | 0.0872 $\pm$ 0.0087 | 32 | 0.0886 $\pm$ 0.007  | 34 | 0.0956 $\pm$ 0.009 | 8 | 0.793           | 0.036         | 0.022           |
| $\alpha_0$ [°] | 58 $\pm$ 3          | 32 | 56.7 $\pm$ 3.6      | 34 | 57.2 $\pm$ 3       | 8 | 0.277           | 0.54          | 0.74            |
| $\phi_0$ [°]   | 57.1 $\pm$ 4        | 18 | 65.8 $\pm$ 5        | 21 | not defined        |   | <.001           | --            | --              |
| $\psi$         | 0.945 $\pm$ 0.04    | 32 | 1.2 $\pm$ 0.112     | 34 | 1.54 $\pm$ 0.15    | 8 | <.001           | <.001         | <.001           |
| c. t. exp. [s] | 0.31 $\pm$ 0.05     | 32 | 0.23 $\pm$ 0.05     | 34 | 0.124 $\pm$ 0.022  | 8 | <.001           | <.001         | <.001           |
| c. t. sim. [s] | 0.253               |    | 0.173               |    | 0.121              |   |                 |               |                 |
| d. s. exp. [s] | 0.08 $\pm$ 0.017    | 18 | 0.05 $\pm$ 0.013    | 21 | ---                |   | <.001           |               |                 |
| d. s. sim. [s] | 0.1                 |    | 0.041               |    |                    |   |                 |               |                 |

781

782

783 **Table 3:** Gait related local leg parameters. Values presented are mean  $\pm$ 1 s.d. of maximal torques for  
 784 each joint and the rotational stiffness for the intertarsal joint (ITJ) at each gait . Torques are displayed  
 785 in Nm/Kg, and the rotational stiffness in Nm/Kg°. Gait related increment resp. decrement is shown in  
 786 %. t-test significance level  $p < 0.05$ .

787

788

| parameter          | walking           | grounded<br>running | running           | w. vs g.r.     | w. vs r.         | g.r. vs r.      |
|--------------------|-------------------|---------------------|-------------------|----------------|------------------|-----------------|
| Torque TMTPJ       | 0.207 $\pm$ 0.05  | 0.221 $\pm$ 0.036   | 0.261 $\pm$ 0.041 | 6.8 %<br>.23   | 26.1 %<br>.008   | 18.1 %<br>.009  |
| Torque ITJ         | 0.343 $\pm$ 0.086 | 0.407 $\pm$ 0.054   | 0.503 $\pm$ 0.063 | 18.7 %<br>.001 | 46.7 %<br><.001  | 23.6 %<br><.001 |
| Torque knee        | 0.129 $\pm$ 0.051 | 0.138 $\pm$ 0.037   | 0.223 $\pm$ 0.06  | 7 %<br>.44     | 72.9 %<br><.001  | 61.6 %<br><.001 |
| Torque hip         | 0.399 $\pm$ 0.078 | 0.451 $\pm$ 0.061   | 0.581 $\pm$ 0,06  | 13 %<br>.004   | 45.6 %<br><.001  | 28.8 %<br><.001 |
| rot. stiffness ITJ | 0.014 $\pm$ 0.004 | 0.011 $\pm$ 0.002   | 0.011 $\pm$ 0.003 | -20%<br>0.01   | -20.7 %<br>0.096 | -0.9%<br>0.92   |

789

790
